# Supplementary material
Source: ML conference proceedings conference paper supplement (https://openreview.net/forum?id=6PoHVQeeHU)
Supplement: supplementary_material [file attachment]

---

# SI: ChemLit-QA: A human evaluated dataset for chemistry RAG tasks

---

**Anonymous Author(s)**

Affiliation

Address

email

## Abstract

1 Retrieval-Augmented Generation (RAG) is a widely used strategy in Large-  
2 Language Models (LLMs) to extrapolate beyond the inherent pre-trained knowl-  
3 edge. Hence, RAG is crucial when working in data-sparse fields such as Chemistry.  
4 The evaluation of RAG systems is commonly conducted using specialized datasets.  
5 However, existing datasets, typically in the form of scientific Question-Answer-  
6 Context (QAC) triplets or QA pairs, are often limited in size due to the labor-  
7 intensive nature of manual curation or require further quality assessment when  
8 generated through automated processes. This highlights a critical need for large,  
9 high-quality datasets tailored to scientific applications. We introduce ChemLit-QA,  
10 a comprehensive, expert-validated, open-source dataset comprising over 1,000  
11 entries specifically designed for chemistry. Our approach involves the initial gener-  
12 ation and filtering of a QAC dataset using an automated framework based on GPT-4  
13 Turbo, followed by rigorous evaluation by chemistry experts. Additionally, we  
14 provide two supplementary datasets: ChemLit-QA-neg focused on negative data,  
15 and ChemLit-QA-multi focused on multihop reasoning tasks for LLMs, further  
16 enhancing the resources available for advanced scientific research.

17 **Clusters of papers from ChemRxiv corpus**

|                                                                                                                                                                                              |                                                                                                                                                                              |                                                                                                                                                                                   |                                                                                                                                                                                    |                                                                                                                                                                                                           |
|----------------------------------------------------------------------------------------------------------------------------------------------------------------------------------------------|------------------------------------------------------------------------------------------------------------------------------------------------------------------------------|-----------------------------------------------------------------------------------------------------------------------------------------------------------------------------------|------------------------------------------------------------------------------------------------------------------------------------------------------------------------------------|-----------------------------------------------------------------------------------------------------------------------------------------------------------------------------------------------------------|
| <p><b>Catalysis</b></p> <ul style="list-style-type: none"> <li>Homogeneous Catalysis</li> <li>Heterogeneous Catalysis</li> <li>Enzymatic Catalysis</li> <li>Single Atom Catalysis</li> </ul> | <p><b>Drug Discovery and Design</b></p> <ul style="list-style-type: none"> <li>Pharmacological Studies</li> <li>Vaccine Development</li> <li>Molecular Targeting"</li> </ul> | <p><b>Energy</b></p> <ul style="list-style-type: none"> <li>Photovoltaics</li> <li>Battery Technologies</li> <li>Renewable Energy Sources</li> </ul>                              | <p><b>Metal-organic-frameworks</b></p> <ul style="list-style-type: none"> <li>Gas Storage and Separation</li> <li>Catalytic Applications</li> <li>Sensing and Detection</li> </ul> | <p><b>Spectroscopy</b></p> <ul style="list-style-type: none"> <li>Nuclear Magnetic Resonance</li> <li>Mass Spectrometry</li> <li>Optical Spectroscopy</li> </ul>                                          |
| <p><b>Digital Discovery</b></p> <ul style="list-style-type: none"> <li>Neural Network Potentials</li> <li>AI for Science</li> <li>Machine Learning Methods</li> </ul>                        | <p><b>Quantum and Theoretical Chemistry</b></p> <ul style="list-style-type: none"> <li>Quantum Computing</li> <li>Theoretical Methods</li> <li>Quantum Effects</li> </ul>    | <p><b>Environment Science and Ecology</b></p> <ul style="list-style-type: none"> <li>Pollution Control</li> <li>Ecological Biodiversity</li> <li>Sustainable Practices</li> </ul> | <p><b>Advanced Materials and Nanotechnology</b></p> <ul style="list-style-type: none"> <li>Nanomaterials</li> <li>Functional Materials</li> <li>Material Properties</li> </ul>     | <p><b>Biomedical Engineering and Technology</b></p> <ul style="list-style-type: none"> <li>Medical Devices and Instruments</li> <li>Regenerative Medicine</li> <li>Biomedical Research Methods</li> </ul> |

Fig. S 1: Hierarchy of topics and subtopics used to cluster ChemRxiv corpus. We used each paper's title and abstract with Mistral to classify level 1 (shown in bold face) and level 2 labels.

18 **Reasoning distribution in ChemLit-QA**

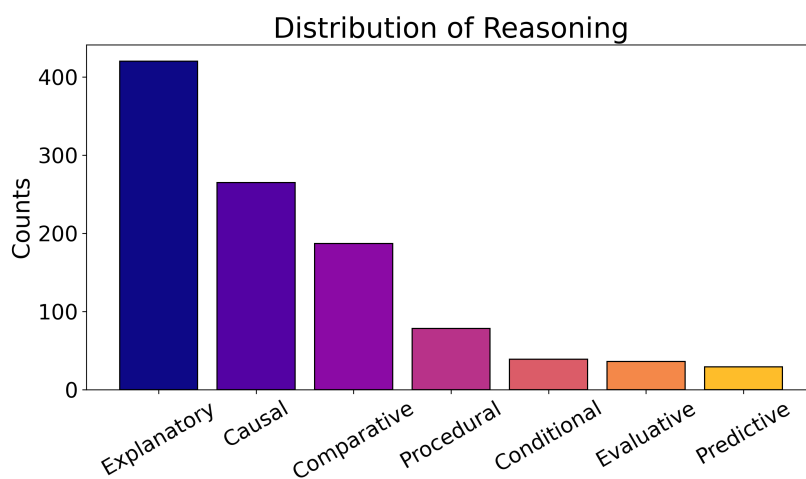

Fig. S 2: Distribution of reasoning in ChemLit-QA.

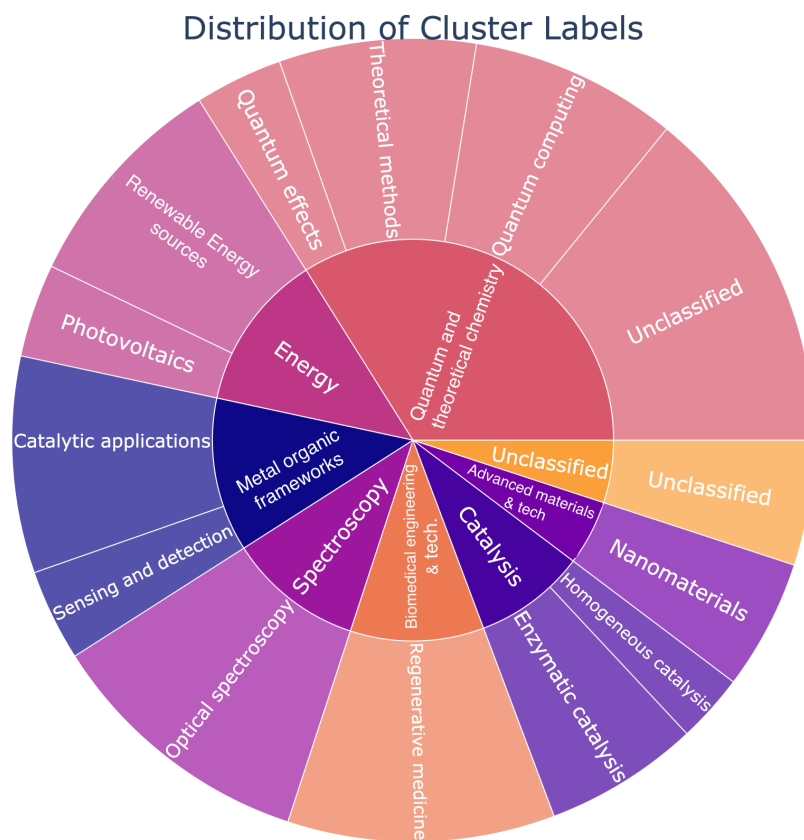

Fig. S 3: Distribution on cluster labels in the ChemLit-QA dataset.

20 **Keyword distribution in ChemLit-QA**

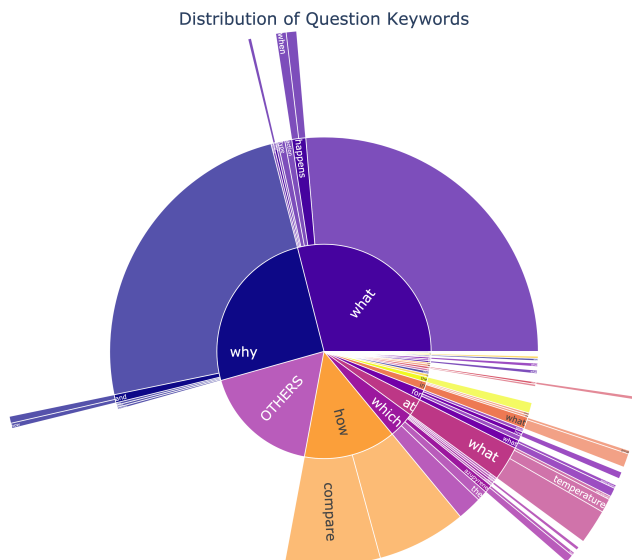

Fig. S 4: Distribution of question keywords in ChemLit-QA.

21 **Expert agreement results**

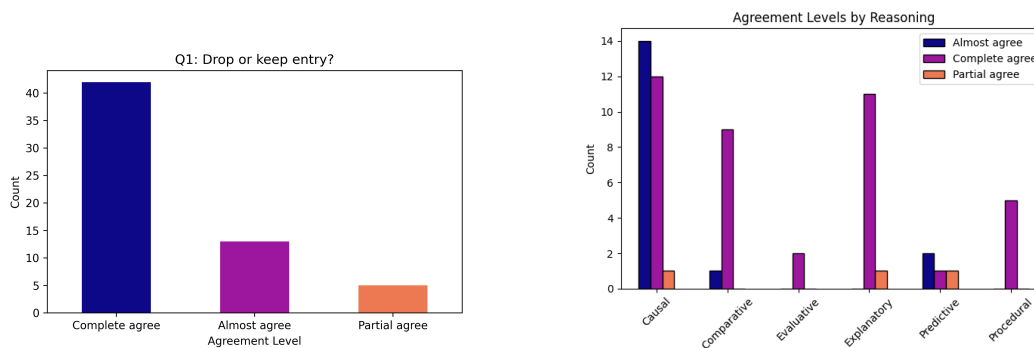

Fig. S 5: Agreement between humans on a) keeping or dropping the dataset entry b) reasoning type

Tab. S 1: Agreement among experts

| <b>Task</b>                    | <b>Complete Agree</b> | <b>Almost Agree</b> | <b>Partial Agree</b> | <b>Disagree</b> |
|--------------------------------|-----------------------|---------------------|----------------------|-----------------|
| Question quality: Keep or drop | 70%                   | 22%                 | 8%                   | 0%              |
| Reasoning type                 | 68%                   | 27%                 | 5%                   | 0%              |
| Difficulty level               | 44%                   | 40%                 | 8%                   | 8%              |

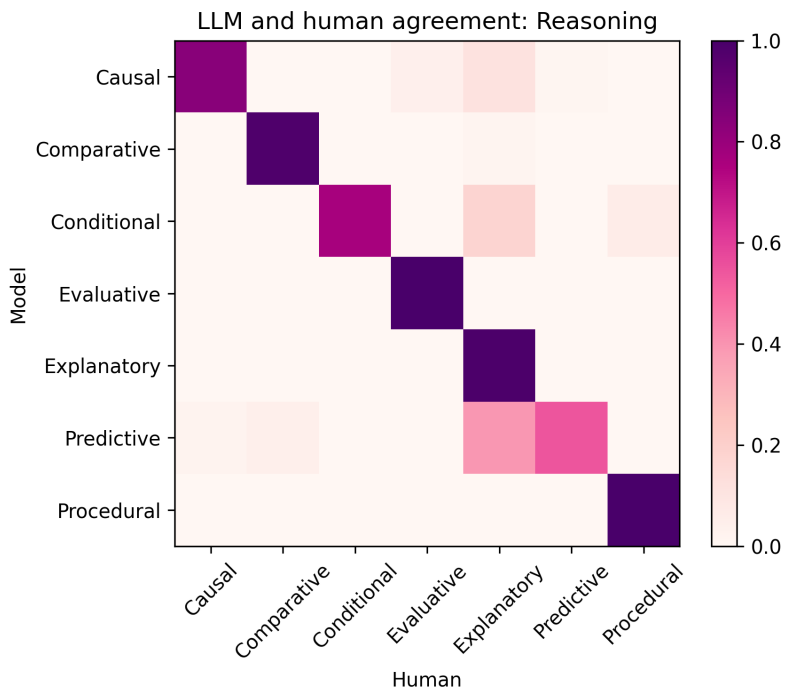

Fig. S 6: Agreement between LLM and experts on answer reasoning type.

## 22 Analysis statistics of the ChemLit-QA dataset

Tab. S 2: Statistical distribution of metrics. All of the given LLM-based metrics were implemented using DeepEval[1] framework and GPT-4o[2].

| Metric                               | Mean $\pm$ std dev. |
|--------------------------------------|---------------------|
| Answer Relevancy Score (GPT-4o)      | 0.99 $\pm$ 0.02     |
| Faithfulness Score (GPT-4o)          | 0.99 $\pm$ 0.01     |
| Hallucination Score (GPT-4o)         | 0.0 $\pm$ 0.0       |
| Question Faithfulness Score (GPT-4o) | 0.93 $\pm$ 0.10     |
| Penalized semantic entropy (GPT-4o)  | 0.20 $\pm$ 0.44     |

23 **Case study: Performance of RAG models in ChemLit-QA dataset**

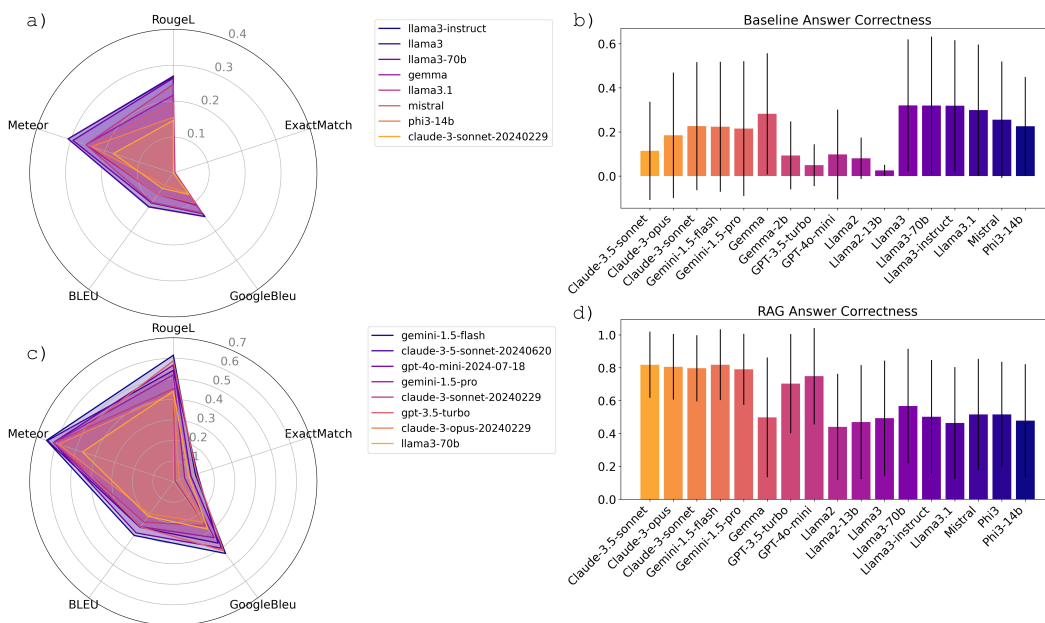

Fig. S 7: (a) The top 8 LLMs' text-based performance on baseline QA. (b) The answer correctness of all tested LLMs on baseline QA. (c) The top 8 LLMs' text-based performance on RAG. (d) The answer correctness of all tested LLMs on RAG.

24 **Case study: Finetuned model performance on ChemLitQA-multi**

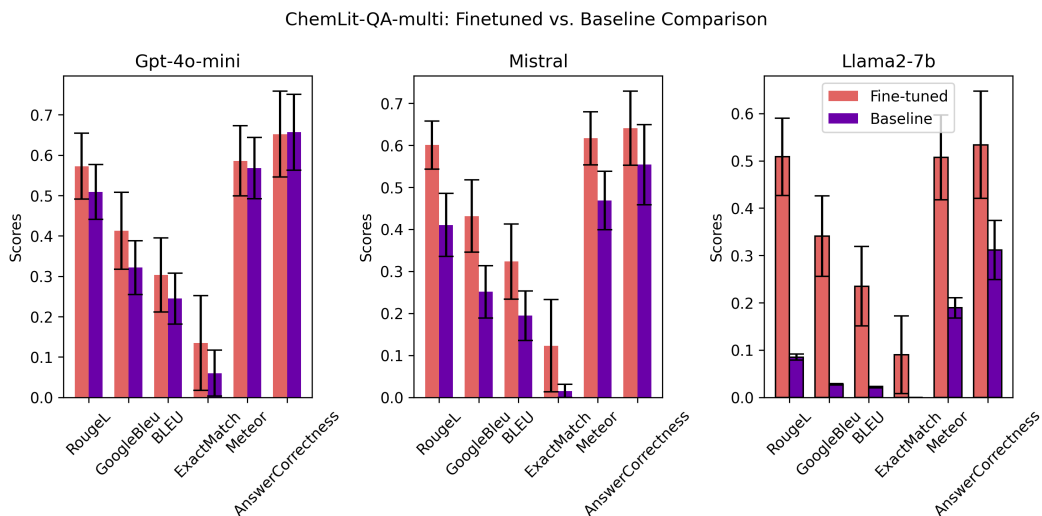

Fig. S 8: Comparison between baseline and fine-tuned performance on the test dataset for GPT-4o-mini, Mistral-7B, and Llama2-7B.

25 **Human evaluations interface**

26 The following figure illustrates the interface used in this work to conduct that human evaluations.  
27 This app was developed using Streamlit(<https://discuss.streamlit.io/>). The left hand panel  
28 allows the users to upload the dataset under review and select the number of entries to review expert  
29 evaluations are collected in the right hand panel.

## ChemLit-QA Evaluations <sup>30</sup>

This app evaluates the following headers from the uploaded dataset created with the ChemLit-QA pipeline:

1. chunk
2. Question
3. Answer
4. Reasoning\_type
5. ID

Make sure your dataset has these headers.

### 1 Upload dataset for evaluation

Drag and drop file here

Limit 200MB per file • CSV

Browse files

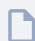

Geemi\_eval\_sub\_1.csv  
356.4KB

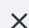

### 2 Enter range of rows for extraction (e.g.

0:100 or all to use all) This will take the subset of rows based on the provided indices.

all

You can stop at any time and resume later.

Make sure to download the results before ending the session.

Download results and end session!

## Prompt

**Chunk:** shows that no dipeptides have populations consisting of just one type of rotamer and there are no extremely high values (as was observed for OPLS-AA and OPLS-AA/L 1 ). The rotamer M populations are occasionally slightly lower than expected. However, given the issues previously mentioned with the experimental data used, further changes were not made to adjust the outliers. The rotamer data, which were used to construct Figure , are reproduced in Table .With a MUE of 14%, QUBE performs better than both OPLS-AA and OPLS-AA/L, which have errors of 23% and 21% respectively. The error is not as low as OPLS-AA/M, which has an error of 10%, however with further empirical changes to the torsional parameters the error could likely be further reduced. Examining individual dipeptide errors, protonated histidine and aspartic acid are found to have the highest errors. The protonated histidine experimental data includes all ionization states of histidine and therefore may not be accurate, which would explain the high error. The higher error in the simulated dynamics of the aspartic acid dipeptide is more problematic and, in future versions of the QUBE force field, further changes to these sidechain torsional parameters may be considered.

**Question:** Why do protonated histidine and aspartic acid dipeptides have the highest errors in their simulated dynamics?

**Answer:** The high error in protonated histidine is explained by the inclusion of all ionization states of histidine in the experimental data, which may not be accurate. For aspartic acid, the higher error is more problematic and may lead to considerations for further changes to sidechain torsional parameters in future versions of the QUBE force field.

**Context:** ['Examining individual dipeptide errors, protonated histidine and aspartic acid are found to have the highest errors. ', 'The protonated histidine experimental data includes all ionization states of histidine and therefore may not be accurate, which would explain the high error. ', 'The higher error in the simulated dynamics of the aspartic acid dipeptide is more problematic and, in future versions of the QUBE force field, further changes to these sidechain torsional parameters may be considered.']

Please evaluate the following and then click on **Next** to continue

Evaluation: 1/36

1. Is this question relevant to the context? Should we drop or keep this question?. Think if this is a good question to ask given the context of the chunk.

- Keep  
 Drop

2. Is the answer correct?

- Correct  
 Incorrect

3. In the case the question is good and the answer is incorrect, please provide the correct answer. (optional) 

4. Do you think the assigned reasoning- **causal** is correct? If not, please select the correct reasoning. 

- Correct assignment  
 Procedural  
 Comparative  
 Causal  
 Conditional  
 Evaluative  
 Predictive



Explanatory

5. How would you rate the difficulty level of the given Q-A pair? Think an easy question must be answered quickly based on the context.

- Easy  
 Medium  
 Hard

6. Do you think the given context is accurate. ie. does it correlate with the answer?

- Correct  
 Incorrect

7. In case the context is not accurate, please provide the correct context. Context should be complete sentences. (optional) ?

 Previous

Next 

32 **All prompts used in the work**

33 The following figure shows all prompts used during the generation process. Tab. S 3 3 explains the  
34 function of each prompt.

Tab. S 3: The function of each prompt in the generation process.

| <b>Name</b>        | <b>Function</b>                                                                                           |
|--------------------|-----------------------------------------------------------------------------------------------------------|
| CLEAN_PROMPT       | The prompt used for classifying the usefulness of the text chunks                                         |
| EXAMPLES_USEFUL    | Example of a useful text chunk, integrated into CLEAN_PROMPT                                              |
| EXAMPLES_USELESS   | Example of a useless text chunk, integrated into CLEAN_PROMPT                                             |
| REASONING_PROMPT   | The prompt for identifying all possible reasoning types from cleaned text chunks                          |
| PROCEDURAL_PROMPT  | The prompt for constructing a procedural question                                                         |
| COMPARATIVE_PROMPT | The prompt for constructing a comparative question                                                        |
| CAUSAL_PROMPT      | The prompt for constructing a causal question                                                             |
| CONDITIONAL_PROMPT | The prompt for constructing a conditional question                                                        |
| EVALUATIVE_PROMPT  | The prompt for constructing a evaluative question                                                         |
| PREDICTIVE_PROMPT  | The prompt for constructing a predictive question                                                         |
| EXPLANATORY_PROMPT | The prompt for constructing a explanatory question                                                        |
| DIFFICULTY_PROMPT  | The prompt for assign difficulty to a question given its corresponding answer and the original text chunk |

## Prompts used during dataset curation

```
CLEAN_PROMPT = """Given the following chunk of text from an academic paper,
please classify if the text is useful or not. Output 'Yes' for useful chunks and
'No' for useless chunks.\n
The following are some general traits of useful and useless chunks,
along with some examples. \n
```

```
Useful chunks usually: \n
```

1. Mainly contain coherent English sentences. \n
2. Include one of the following: in-depth discussion scientific entities, coherent experiment procedures, meaningful comparison, intensive reasoning.

```
Useless chunks usually: \n
```

1. Are too short (only one or two sentences). \n
2. Contain non-relevant information to the main text such as title, author information, figure captions, references, declarations, etc. \n
3. Contain simple introduction to concepts without further discussions. \n
4. Contain ill-formatted formulae or tables that not readable by humans. \n
5. Simply recorded the authors' experimental procedures without explicit order. \n

```
Examples of useful chunks: \n
```

```
{example_useful}
```

```
Examples of useless chunks: \n
```

```
{example_useless}
```

```
Text to classify: {chunk}
```

```
usefulness: Yes or No
```

```
Format instructions: \n{format_instructions}
```

```
"""
```

```
EXAMPLES_USEFUL = """
```

```
'd was accurate according to our criteria
(0.8 < K d / K d,inp < 1.25) for r 1 / r 2 2.5 but not for r 1 / r 2 5.
At r 1 / r 2 = 0.25 we obtained a binding isotherm with anomalous shape (Figures S2)
and K d / K d,inp = 1.27. This anomaly was due to a numerical artifact from meshing in
COMSOL; by using a more refined mesh we obtained K d / K d,inp < 1.02.
The improvement in accuracy by mesh refinement may suggest that the large deviations
in K d at r 1 / r 2 5 are also due to too coarse meshes as well. Thus, more refined
and optimized meshes (in particular, for boundary regions between small and
large areas) could improve K d determination in a virtual ACTIS experiment.
```

We confirmed this for the extreme value of  $r_1 / r_2 = 50$  and found an optimal  $K_d / K_{d,inp} = 1.00$  at the expense of excessively increasing the computational time (72 h instead of 3 h) and the potential risk of overfitting (SI). In order to keep studies consistent, comparable and in a reasonable time', \n  
 ""

EXAMPLES\_USELESS = ""  
 ' ASSOCIATED CONTENT Supporting InformationThe Supporting Information is available free of charge on the ACS Publications website and on ChemRxiv (DOI:10.26434/chemrxiv.12345644). Theoretical background for computer simulation and data evaluation; Simulation of separagrams; Figure , Variation in  $k_{off}$ ,  $inp$ -separagrams and binding isotherms; Figure , Variation in injection loop dimensions -separagrams and binding isotherms; Figure , Variation in injection loop dimensions -sample-plug distribution; Figure , Variation in separation capillary radii -separagrams and binding isotherms; Figure , Velocity streamlines at different separation capillary radii; Figure , Variation in the initial', \n  
 ""

REASONING\_PROMPT = ""  
 Please identify all the suitable types of questions to generate given a piece of text. Your available options are: ['Procedural', 'Comparative', 'Causal', 'Conditional', 'Evaluative', 'Predictive', 'Explanatory']. Please choose solely from the options. The options are defined as follows:\n

A Procedural question asks about the order between steps in a clearly formulated procedure. These procedures are often indicated by words such as 'first', 'then', 'finally', followed by actions. \n

A Comparative question asks about the relation between mutual properties of comparable entities, Common mutual properties include numbers, years, etc. \n

A Causal question asks about the reasons for a specific phenomenon. The phenomenon can be given implicitly or by explicit clauses such as 'for example'. \n

A Conditional question asks about the possible outcomes given a scenario.

Scenarios are often given by conditional clauses such as 'if', 'when', etc.\n

An Evaluative question asks about the benefits and drawbacks of a given entity.\n

A Predictive question asks for reasonable inference, often on the properties of entities closely related to but not mentioned in the text. \n

An Explanatory question asks for a component from a statement made in the text. \n

Text: {text}

Structure your output in the following format:

Process: <Record here in detail how you go through each step of the instruction.>

Reasoning\_types: <The reasoning types you chose>

Format instructions: \n{format\_instructions}

""

PROCEDURAL\_PROMPT = ""

Please follow the instruction below to formulate a Procedural question based on the given text. A Procedural question asks about the order between steps in a \clearly formulated procedure. These procedures are often indicated by words such as \ 'first', 'then', 'finally', followed by actions. You should go through the entire text and form questions only base on complete \sentences. \n

1. Identify the procedure mentioned in the text. If no processes are mentioned, skip the following steps and output 'NaN' for <question>, <answer> and <context>.
2. List all steps in the process mentioned by the question in the exact same order as provided. \n
3. Choose one step (step1) from the process.\n
4. Determine its position in the process. i.e. where is it ranked in the process, the first, the second, or other?\n
5. Raise a question in the format: What is the <position> step in <summary of the process>? \n
6. Optionally, choose another step (step2) from the process. Determine the relative position of step1 to step2.\n
7. Raise a question in the following format: What is the <ordinal, relative position> step before/after <step2> in <summary of the process>? Replace the original question with the new one. \n
8. Record the question, answer, and context in the output. <question> should be the question you raised. <answer> should be step1, rephrased to be grammatically correct when necessary. <context> should be the original text containing the full process only.

Text: {text}

Structure your output in the following format:

Process: <Record here in detail how you go through each step of the instruction.>

Question: <question>

Answer: <answer>

Context: <context>

Format instructions: \n{format\_instructions}  
""

COMPARATIVE\_PROMPT = ""

Please follow the instruction below to formulate a Comparative question based on the given text.

A Comparative question asks about the relation between mutual properties of comparable entities, Common mutual properties include numbers, years, etc.

You should go through the entire text and form questions only base on complete sentences.\n

1. Identify the comparable entities in the text, the comparable properties, e.g. numbers, years, etc, and their relation from the text. If there are no comparable

properties or no relations are mentioned, skip the following steps and output 'NaN' for <question>, <answer> and <context>.

2. Identify the entities associated with the comparable values. \n
3. Randomly choose at least two entities and raise a question which asks about the relation between the comparable values of these entities. You should not disclose information on the relation in the question.\n
4. Record the question, answer, and context in the output. <question> should be the question you raised. <answer> should be the relation you are asking for, including the result of comparison (e.g. bigger, smaller, similar, etc). Rephrase the answer to be grammatically correct. <context> should be all sentences in the original text excerpts describing the entities and their comparable values only. \n

Text: {text}

Structure your output in the following format:

Process: <Record here in detail how you go through each step of the instruction.>

Question: <question>

Answer: <answer>

Context: <context>

Format instructions: \n{format\_instructions}

"""

CAUSAL\_PROMPT = """

Please follow the instruction below to formulate a Causal question based on the given text. A Causal question asks about the reasons for a specific phenomenon.

The phenomenon can be given implicitly or by explicit clauses such as 'for example'.

You should go through the entire text and form questions only based on complete sentences.\n

1. Identify the reasoning and scenario in the text. If no examples are mentioned, skip the following steps and output 'NaN' for <question>, <answer> and <context>.
  2. Rephrase the scenario into a question. Do not add or delete any information. \n
  3. Record the question, answer, and context in the output. <question> should be the question you raised. <answer> should be an explanation of the scenario based on the reasoning, rephrased to be grammatically correct when necessary. \n
- <context> should be all sentences in the original text containing the claims only.

Text: {text}

Structure your output in the following format:

Process: <Record here in detail how you go through each step of the instruction.>

Question: <question>

Answer: <answer>

Context: <context>

```
Format instructions: \n{format_instructions}
"""
```

```
CONDITIONAL_PROMPT = """
```

Please follow the instruction below to formulate a Conditional question based on the given text.

A Conditional question asks about the possible outcomes given a scenario. Scenarios are often given by conditional clauses such as 'if', 'when', etc.

You should go through the entire text and form questions only base on complete sentences.\n

1. Identify the text containing conditions, e.g. clauses with 'if'. If no conditions are mentioned, skip the following steps and output 'NaN' for <question>, <answer> and <context>.
2. Identify the possible scenarios and the corresponding actions. \n
3. Formulate a question which asks for the action given one of the scenarios. You can choose scenarios not mentioned in the text. \n
4. Record the question, answer, and context in the output. <question> should be the question you raised. <answer> should be the corresponding action, rephrased to be grammatically correct when necessary. <context> should be all sentences in the original text containing the statements only. \n

```
Text: {text}
```

Structure your output in the following format:

Process: <Record here in detail how you go though each step of the instruction.>

Question: <question>

Answer: <answer>

Context: <context>

```
Format instructions: \n{format_instructions}
"""
```

```
EVALUATIVE_PROMPT = """
```

Please follow the instruction below to formulate an Evaluative question based on the given text.

An Evaluative question asks about the benefits and drawbacks of a given entity. \n

You should go through the entire text and form questions only base on complete sentences.\n

1. List all statements made in the text. Find if any statements explain the properties of a specific entity and imply value judgements. Define these statement as 'necessary statements'. If no statements satisfy the requirements, skip the following steps and output 'NaN' for <question>, <answer> and <context>.
2. Reformulate the 'necessary statements' in the format: <entity>: <properties> \n
3. Classify the properties as positive or negative. \n

4. Raise a question based on the format: What are the pros and cons / benefits / drawbacks of <entity>? Paraphrase the question. \n
5. Record the question, answer, and context in the output. <question> should be the question you raised. <answer> should contain all <properties> associated with the authors' attitude, rephrased to be grammatically correct when necessary. <context> should be all sentences in the original text containing 'necessary statements' only.

Text: {text}

Structure your output in the following format:

Process: <Record here in detail how you go through each step of the instruction.>

Question: <question>

Answer: <answer>

Context: <context>

Format instructions: \n{format\_instructions}  
 """

PREDICTIVE\_PROMPT = ""

Please follow the instruction below to formulate a Predictive question based on the given text.

A Predictive question asks for reasonable inference, often on the properties of entities closely related to but not mentioned in the text.

You should go through the entire text and form questions only based on complete sentences.\n

1. List all statements made in the text. Find if any statements explain the properties of a specific entity. Define these statements as 'necessary statements'. If no statements satisfy the requirements, skip the following steps and output 'NaN' for <question>, <answer> and <context>.
2. Randomly choose from the following one category of transformations with equal probability: \n
  - a. Negation \n
  - b. Generalization/specification \n
  - c. Analogy \n
3. Apply to the most suitable entity-property pair. The transformed entity and property must both make sense scientifically. \n
4. Raise a question which asks for the property of the transformed entity. Do not disclose any information about the transformed property in the question. \n
5. Record the question, answer, and context in the output. <question> should be the question you raised. <answer> should contain <transformed properties> and be rephrased to be grammatically correct when necessary. <context> should be all sentences in the original text containing the 'necessary statements' only. \n

Text: {text}



Structure your output in the following format:  
 Process: <Record here in detail how you go through each step of the instruction.>  
 Question: <question>  
 Answer: <answer>  
 Context: <context>

Format instructions: \n{format\_instructions}  
 """

EXPLANATORY\_PROMPT = ""

Please follow the instruction below to formulate an Explanatory question based on the given text.

An Explanatory question asks for a component from a statement made in the text. \n  
 You should go through the entire text and form questions only base on complete sentences.\n

1. List all statements made in the text.
2. Choose a statement and replace part of it with an appropriate interrogative pronoun. The part you replace should be specific. You should not mention the replaced information in the question. \n
3. Rephrase the question to be grammatically correct. \n
4. Record the question, answer, and context in the output. <question> should be the question you raised. <answer> should be the part you replaced, rephrased to be grammatically correct when necessary. <context> should be all sentences in the original text containing the chosen statement only. \n

Text: {text}

Structure your output in the following format:  
 Process: <Record here in detail how you go through each step of the instruction.>  
 Question: <question>  
 Answer: <answer>  
 Context: <context>

Format instructions: \n{format\_instructions}  
 """

DIFFICULTY\_PROMPT = ""

You are given a text chunk and a question-answer pair derived from the chunk. Please assign one of the labels from 'Easy', 'Medium' and 'Hard' to <difficulty>, where the easiest question is one whose answer is directly available in a single sentence in the chunk, and the hardest question is one which requires information from multiple sentences in the chunk and complex reasoning to arrive at the answer.

Question: {question}  
 Answer: {answer}

Chunk: {chunk}

Structure your output in the following format:  
Difficulty: <difficulty>

Format instructions: \n{format\_instructions}  
"""

43 **References**

- 44 [1] Jeffrey Ip et al. Deepeval: The open-source llm evaluation framework. *Confident AI*, 2024.
- 45 [2] Open AI. Hello gpt-4o, 2024.
